# Supplementary material
Source: PubMed Central journal article supplement (PMC6070050)
Supplement: kwy041wuwebtablesandfigures.pdf [file kwy041wuwebtablesandfigures.pdf]

**Web Table 1.** Characteristics of included and excluded participants, Cardiovascular Health Study.

| <b>Characteristics</b>                    | <b>5 indicators measured<br/>(N = 4,243)</b> | <b>≥1 indicator unmeasured<br/>(N = 695)</b> | <b><i>p</i><sup>a</sup></b> |
|-------------------------------------------|----------------------------------------------|----------------------------------------------|-----------------------------|
| Age, years, mean (SD)                     | 72.1 (5.0)                                   | 74.4 (6.5)                                   | <.001                       |
| Male, No. (%)                             | 1,788 (42.1)                                 | 239 (34.4)                                   | <.001                       |
| White (vs. Black), No. (%)                | 3,683 (86.8)                                 | 531 (76.4)                                   | <.001                       |
| Education                                 |                                              |                                              | <.001                       |
| < High school, No. (%)                    | 1,058 (25.0)                                 | 289 (41.8)                                   |                             |
| = High school, No. (%)                    | 1,212 (28.6)                                 | 157 (22.7)                                   |                             |
| > High school, No. (%)                    | 1,964 (46.4)                                 | 245 (35.5)                                   |                             |
| Smoking status                            |                                              |                                              | .039                        |
| Never, No. (%)                            | 1,882 (45.2)                                 | 327 (49.6)                                   |                             |
| Former, No. (%)                           | 1,888 (45.4)                                 | 264 (40.0)                                   |                             |
| Current, No. (%)                          | 392 (9.4)                                    | 68 (10.3)                                    |                             |
| Body mass index, kg/m <sup>2</sup>        |                                              |                                              | .737                        |
| Underweight/normal <sup>b</sup> , No. (%) | 1,589 (37.5)                                 | 135 (37.7)                                   |                             |
| Overweight, No. (%)                       | 1,793 (42.3)                                 | 145 (40.5)                                   |                             |
| Obese, No. (%)                            | 861 (20.3)                                   | 78 (21.8)                                    |                             |
| Coronary heart disease, No. (%)           | 926 (21.8)                                   | 194 (27.9)                                   | <.001                       |
| Heart failure, No. (%)                    | 241 (5.7)                                    | 99 (14.2)                                    | <.001                       |
| Stroke, No. (%)                           | 209 (4.9)                                    | 79 (11.4)                                    | <.001                       |
| Hypertension                              |                                              |                                              | <.001                       |
| Borderline, No. (%)                       | 632 (14.9)                                   | 79 (13.8)                                    |                             |
| Hypertensive, No. (%)                     | 1,738 (41.0)                                 | 306 (53.3)                                   |                             |
| Diabetes                                  |                                              |                                              | <.001                       |
| Prediabetes, No. (%)                      | 407 (9.9)                                    | 33 (7.8)                                     |                             |
| Diabetes, No. (%)                         | 620 (15.1)                                   | 107 (25.4)                                   |                             |
| Cancer <sup>c</sup> , No. (%)             | 600 (14.2)                                   | 98 (14.1)                                    | .963                        |
| Arthritis, No. (%)                        | 1,929 (46.6)                                 | 372 (58.7)                                   | <.001                       |
| 3MS <sup>d</sup> , mean (SD)              | 91.2 (8.4)                                   | 82.2 (17.6)                                  | <.001                       |
| ADL disability <sup>e</sup> , No. (%)     | 430 (10.2)                                   | 204 (30.8)                                   | <.001                       |
| Systolic BP, mmHg, mean (SD)              | 135.6 (21.2)                                 | 138.6 (21.4)                                 | .002                        |
| Diastolic BP, mmHg, mean (SD)             | 70.7 (11.2)                                  | 70.4 (12.9)                                  | .583                        |
| C reactive protein, μg/L, mean (SD)       | 5.2 (9.7)                                    | 6.2 (11.7)                                   | .101                        |
| Cystatin C, mg/L, mean (SD)               | 1.1 (0.3)                                    | 1.2 (0.5)                                    | <.001                       |
| Total cholesterol, mg/dL, mean (SD)       | 208.2 (38.5)                                 | 210.0 (42.7)                                 | .421                        |
| Fasting glucose, mg/dL, mean (SD)         | 108.1 (33.0)                                 | 108.9 (36.4)                                 | .665                        |

**Abbreviations:** SD, standard deviation; ADL, activities of daily living; BP, blood pressure.

<sup>a</sup> *p*-values were obtained from t test with unequal variance or  $\chi^2$  test for comparison between adults with complete frailty assessment and those with at least one indicator not measured.

<sup>b</sup> Underweight and normal were collapsed due to small cell size in the underweight category.

<sup>c</sup> Non-melanoma skin cancer was excluded.

<sup>d</sup> Ranging from 0 to 100 with higher score indicating a better global cognitive function.

<sup>e</sup> Having difficulty in any of the following six basic activities of daily living: dressing, eating, toileting, bathing, transferring or getting out of bed, and walking across a room.

**Web Table 2.** Characteristics of included and excluded participants, Health and Retirement Study.

| <b>Characteristics</b>                         | <b>5 indicators measured<br/>(N = 7,600)</b> | <b>≥1 indicator unmeasured<br/>(N = 1,621)</b> | <b><i>p</i><sup>a</sup></b> |
|------------------------------------------------|----------------------------------------------|------------------------------------------------|-----------------------------|
| Age, years, mean (SD)                          | 74.9 (6.9)                                   | 75.5 (7.8)                                     | .005                        |
| Male, No. (%)                                  | 3,315 (43.6)                                 | 586 (36.2)                                     | <.001                       |
| White (vs. others), No. (%)                    | 6,763 (89.0)                                 | 1,260 (77.7)                                   | <.001                       |
| Education                                      |                                              |                                                | <.001                       |
| < High school, No. (%)                         | 1,838 (24.2)                                 | 568 (35.1)                                     |                             |
| = High school, No. (%)                         | 2,729 (35.9)                                 | 545 (33.6)                                     |                             |
| > High school, No. (%)                         | 3,032 (39.9)                                 | 507 (31.3)                                     |                             |
| Smoking status                                 |                                              |                                                | .897                        |
| Never, No. (%)                                 | 3,279 (43.4)                                 | 660 (41.1)                                     |                             |
| Former, No. (%)                                | 3,575 (47.3)                                 | 737 (45.9)                                     |                             |
| Current, No. (%)                               | 702 (9.3)                                    | 210 (13.1)                                     |                             |
| Body mass index, kg/m <sup>2</sup> , mean (SD) |                                              |                                                | .289                        |
| Underweight/normal <sup>b</sup> , No. (%)      | 2,009 (26.4)                                 | 417 (26.5)                                     |                             |
| Overweight, No. (%)                            | 2,856 (37.6)                                 | 544 (34.5)                                     |                             |
| Obese, No. (%)                                 | 2,735 (36.0)                                 | 615 (39.0)                                     |                             |
| Cardiac disease <sup>c</sup> , No. (%)         | 2,341 (30.8)                                 | 585 (36.1)                                     | <.001                       |
| Stroke, No. (%)                                | 518 (6.9)                                    | 205 (12.7)                                     | <.001                       |
| Hypertension, No. (%)                          | 4,850 (63.9)                                 | 1,114 (68.9)                                   | <.001                       |
| Lung disease, No. (%)                          | 867 (11.4)                                   | 1,369 (15.5)                                   | <.001                       |
| Diabetes, No. (%)                              | 1,653 (21.8)                                 | 458 (28.3)                                     | <.001                       |
| Cancer <sup>d</sup> , No. (%)                  | 1,453 (19.1)                                 | 295 (18.2)                                     | .389                        |
| Arthritis, No. (%)                             | 5,196 (68.4)                                 | 1,210 (74.7)                                   | <.001                       |
| TICS <sup>e</sup> , mean (SD)                  | 9.3 (1.2)                                    | 8.9 (1.7)                                      | <.001                       |
| ADL disability <sup>f</sup> , No. (%)          | 1,146 (21.0)                                 | 598 (44.3)                                     | <.001                       |
| Systolic BP, mmHg, mean (SD)                   | 134.4 (20.8)                                 | 133.7 (22.3)                                   | .287                        |
| Diastolic BP, mmHg, mean (SD)                  | 78.4 (11.6)                                  | 78.1 (12.6)                                    | .431                        |
| C reactive protein, µg/L, mean (SD)            | 4.3 (8.6)                                    | 6.5 (12.6)                                     | <.001                       |
| Cystatin C, mg/L, mean (SD)                    | 1.2 (0.5)                                    | 1.3 (0.8)                                      | <.001                       |
| HDL cholesterol, mg/dL, mean (SD)              | 54.2 (15.9)                                  | 52.0 (15.1)                                    | <.001                       |
| Total cholesterol, mg/dL, mean (SD)            | 197.9 (41.7)                                 | 192.1 (40.9)                                   | <.001                       |
| HbA1c, %, mean (SD)                            | 5.9 (0.9)                                    | 6.0 (1.0)                                      | <.001                       |

**Abbreviations:** SD, standard deviation; ADL, activities of daily living; BP, blood pressure; HDL, high-density lipoprotein; HbA1c, glycosylated hemoglobin.

<sup>a</sup> *p*-values were obtained from generalized linear regression with clustered sandwich estimator for comparison between included and excluded participants.

<sup>b</sup> Underweight and normal were collapsed due to small cell size in the underweight category.

<sup>c</sup> Myocardial infarction, coronary heart disease, angina, heart failure, or other heart problems.

<sup>d</sup> Non-melanoma skin cancer was excluded.

<sup>e</sup> Ranging from 0 to 10 with higher score indicating a better global cognitive function.

<sup>f</sup> Having difficulty in any of the following six basic activities of daily living: dressing, eating, toileting, bathing, transferring or getting out of bed, and walking across a room.

**Web Table 3.** Sample variance-covariance matrix between five frailty indicators.

|                                | Cardiovascular Health Study |               |            |                   |             |
|--------------------------------|-----------------------------|---------------|------------|-------------------|-------------|
|                                | Gait speed                  | Grip strength | Exhaustion | Physical activity | Weight loss |
| Gait speed <sup>*</sup>        | 46.44                       |               |            |                   |             |
| Grip strength <sup>†</sup>     | 0.30                        | 0.05          |            |                   |             |
| Exhaustion <sup>‡</sup>        | -2.14                       | -0.14         | 7.60       |                   |             |
| Physical activity <sup>§</sup> | 14.10                       | 0.68          | -7.13      | 315.41            |             |
| Weight loss <sup>  </sup>      | -0.13                       | -0.01         | 0.02       | -0.83             | 0.01        |

  

|                                | Health and Retirement Study |               |            |                   |             |
|--------------------------------|-----------------------------|---------------|------------|-------------------|-------------|
|                                | Gait speed                  | Grip strength | Exhaustion | Physical activity | Weight loss |
| Gait speed <sup>*</sup>        | 51.67                       |               |            |                   |             |
| Grip strength <sup>†</sup>     | 0.53                        | 0.07          |            |                   |             |
| Exhaustion <sup>‡</sup>        | -0.65                       | -0.04         | 0.45       |                   |             |
| Physical activity <sup>§</sup> | 31.11                       | 1.49          | -3.22      | 453.76            |             |
| Weight loss <sup>  </sup>      | -0.02                       | -0.01         | 0.01       | -0.04             | 0.01        |

\* Gait speed (m/s) was measured over a 4.6-meter and a 2.5-meter course in the Cardiovascular Health Study and the Health and Retirement Study, respectively.

† Grip strength (kg) was measured by a hand dynamometer in both cohorts.

‡ Exhaustion was measured by two items from the Center for Epidemiologic Studies Depression Scale (“I could not get going” and “I felt that everything I did was an effort”); the total score ranged from 0-12 in the Cardiovascular Health Study and from 0-2 in the Health and Retirement Study.

§ Physical activity was measured by self-reported total energy expenditure in the Cardiovascular Health Study and by self-reported frequency of light, moderate, and vigorous activities in the Health and Retirement Study.

|| Weight loss was defined as (weight in previous visit - current weight measure)/(weight in previous visit)×100%.

**Web Figure 1.** Scree plots of eigenvalues from the exploratory factor analysis (top: Cardiovascular Health Study; bottom: Health and Retirement Study).

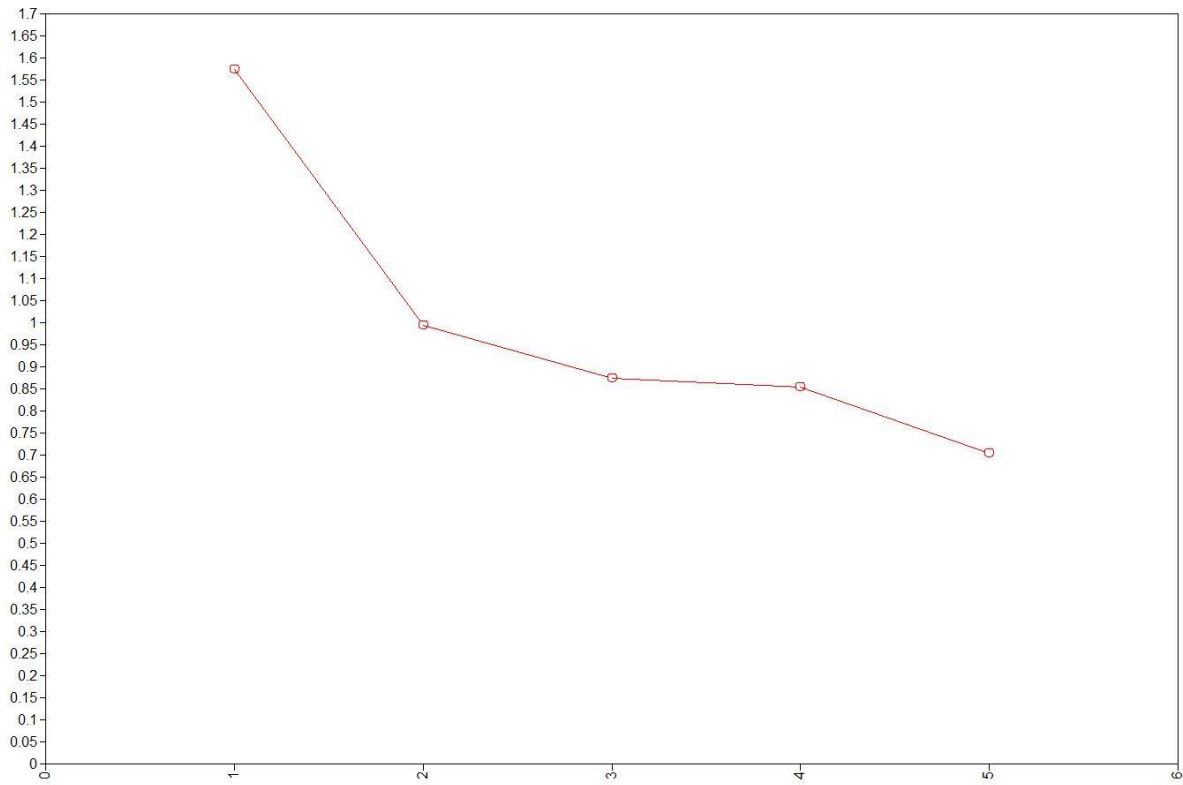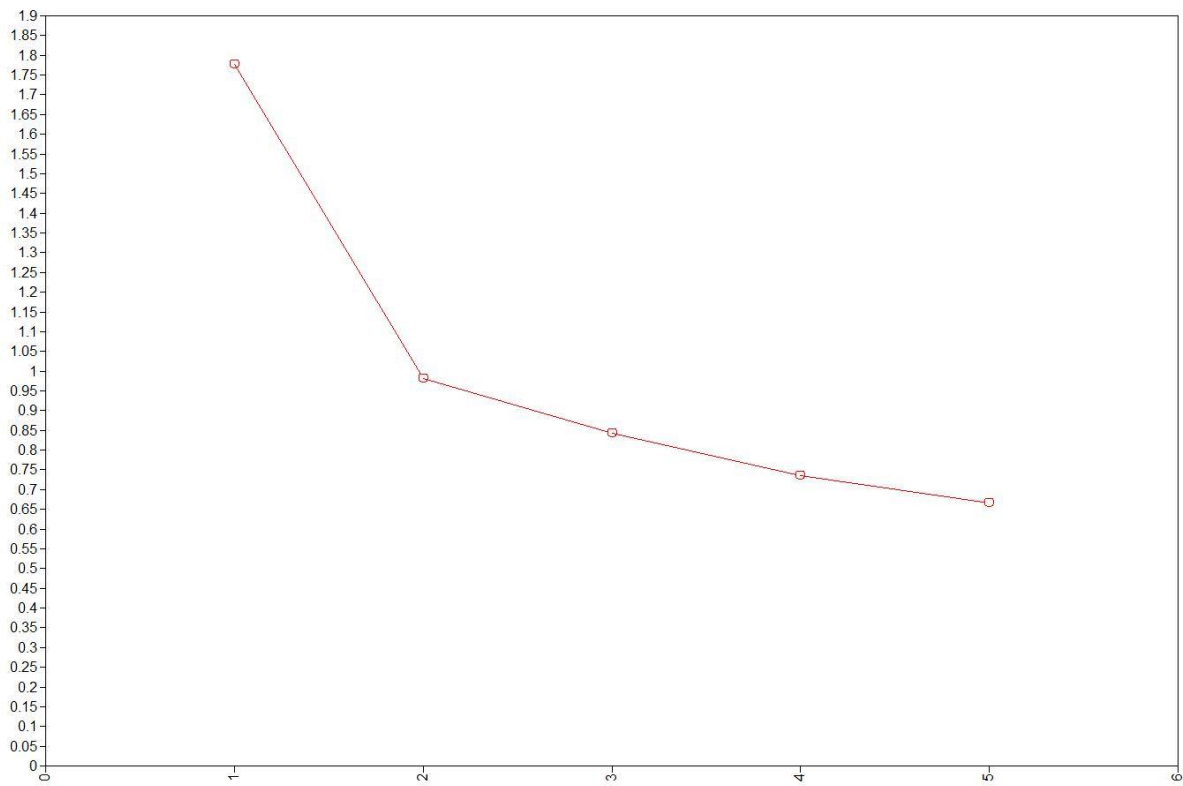

**Web Table 4.** Standardized factor loadings, goodness-of fit-indices, and calculation of the continuous frailty score.

|                                                | Cardiovascular Health Study<br>N=4,243                           | Health and Retirement Study<br>N=7,600                       |
|------------------------------------------------|------------------------------------------------------------------|--------------------------------------------------------------|
| <b>Indicators</b>                              | <b>Standardized factor loadings (standard error)</b>             |                                                              |
| Gait speed*                                    | -0.55 (0.03)                                                     | -0.61 (0.02)                                                 |
| Grip strength†                                 | -0.33 (0.02)                                                     | -0.43 (0.01)                                                 |
| Exhaustion‡                                    | 0.37 (0.02)                                                      | 0.40 (0.02)                                                  |
| Physical activity§                             | -0.33 (0.02)                                                     | -0.47 (0.02)                                                 |
| Weight loss                                    | 0.09 (0.02)                                                      | 0.15 (0.02)                                                  |
| <b>Indices</b>                                 | <b>Goodness-of-fit indices of CFA</b>                            |                                                              |
| $\chi^2_5$ (P-value)                           | 10.56 (0.061)                                                    | 52.65 (<0.001)                                               |
| CFI                                            | 0.991                                                            | 0.976                                                        |
| TLI                                            | 0.982                                                            | 0.951                                                        |
| RMSEA (90% CI)                                 | 0.016 (0.000, 0.030)                                             | 0.035 (0.027, 0.044)                                         |
| Ill localized fit                              | None                                                             | None                                                         |
| <b>Calculation of continuous frailty score</b> |                                                                  |                                                              |
|                                                | Continuous frailty score =                                       | Continuous frailty score =                                   |
|                                                | $-.55 \times \frac{\text{Gait Speed}}{0.23} +$                   | $-.61 \times \frac{\text{Gait Speed}}{0.26} +$               |
|                                                | $-.33 \times \frac{\text{Grip strength}}{6.81} +$                | $-.43 \times \frac{\text{Grip strength}}{7.19} +$            |
|                                                | $.37 \times \frac{\text{Exhaustion}-1.93}{2.76} +$               | $.40 \times \frac{\text{Exhaustion}-0.40}{0.67} +$           |
|                                                | $-.33 \times \frac{\text{Physical activity}-1452.06}{1775.96} +$ | $-.47 \times \frac{\text{Physical activity}-25.86}{21.30} +$ |
|                                                | $.09 \times \frac{\text{Weight loss}-0.54}{3.48}$                | $.15 \times \frac{\text{Weight loss}-(-0.62)}{3.74}$         |

**Abbreviations:** CFA, confirmatory factor analysis; CFI, Comparative Fit Index; TLI, Tucker-Lewis Index; RMSEA, root mean square error of approximation; CI, confidence interval.

\* Gait speed (m/s) was measured over a 4.6-meter and a 2.5-meter course in the Cardiovascular Health Study and the Health and Retirement Study, respectively. Gait speed residual was calculated using sex-specific regression models regression gait speed on standing height.

† Grip strength (kg) was measured by a hand dynamometer in both cohorts. Grip strength residual was calculated using sex-specific regression models regression gait speed on body mass index.

‡ Exhaustion was assessed by 2 questions (“I could not get going” and “I felt that everything I did was an effort”); the total score ranged from 0-12 in the Cardiovascular Health Study and from 0-2 in the Health and Retirement Study.

§ Physical activity was measured by self-reported total energy expenditure in the Cardiovascular Health Study and by self-reported frequency of light, moderate, and vigorous activities in the Health and Retirement Study.

|| Weight loss was defined as (weight in previous visit - current weight measure)/(weight in previous visit)×100%.

**Web Table 5.** Standardized factor loadings and goodness-of-fit indices of confirmatory factor analysis in the Health and Retirement Study (sensitivity analysis).

|                    | Health and Retirement Study<br>Exhaustion            |                      |
|--------------------|------------------------------------------------------|----------------------|
|                    | Continuous                                           | Ordered categorical  |
|                    | <b>Standardized factor loadings (standard error)</b> |                      |
| Gait speed*        | -0.61 (0.02)                                         | -0.61 (0.02)         |
| Grip strength†     | -0.43 (0.01)                                         | -0.45 (0.01)         |
| Exhaustion‡        | 0.40 (0.02)                                          | 0.45 (0.02)          |
| Physical activity§ | -0.47 (0.02)                                         | -0.49 (0.02)         |
| Weight loss        | 0.15 (0.02)                                          | 0.12 (0.02)          |
|                    | <b>Goodness-of-fit indices of CFA</b>                |                      |
| $\chi^2$ (P-value) | 52.65 (<0.001)                                       | 81.95 (<0.001)       |
| CFI                | 0.976                                                | 0.977                |
| TLI                | 0.951                                                | 0.954                |
| RMSEA (90% CI)     | 0.035 (0.027, 0.044)                                 | 0.045 (0.037, 0.052) |
| Ill localized fit  | None                                                 | None                 |

**Abbreviations:** CFA, confirmatory factor analysis; CFI, Comparative Fit Index; TLI, Tucker-Lewis Index; RMSEA, root mean square error of approximation; CI, confidence interval.

\* Gait speed (m/s) was measured over a 2.5-meter course in the Health and Retirement Study, respectively. Gait speed residual was calculated using sex-specific regression models regression gait speed on standing height.

† Grip strength (kg) was measured by a hand dynamometer in both cohorts. Grip strength residual was calculated using sex-specific regression models regression gait speed on body mass index.

‡ Exhaustion was assessed by 2 questions (“I could not get going” and “I felt that everything I did was an effort”); the total score ranged from 0-2 in the Health and Retirement Study.

§ Physical activity was measured by self-reported frequency of light, moderate, and vigorous activities in the Health and Retirement Study.

|| Weight loss was defined as (weight in previous visit - current weight measure)/(weight in previous visit)×100%.

**Web Table 6.** Standardized residual matrix from the one-factor model of frailty.

|                                | Cardiovascular Health Study |               |            |                   |             |
|--------------------------------|-----------------------------|---------------|------------|-------------------|-------------|
|                                | Gait speed                  | Grip strength | Exhaustion | Physical activity | Weight loss |
| Gait speed <sup>*</sup>        | -                           |               |            |                   |             |
| Grip strength <sup>†</sup>     | -0.091                      | -             |            |                   |             |
| Exhaustion <sup>‡</sup>        | -0.857                      | 1.311         | -          |                   |             |
| Physical activity <sup>§</sup> | -1.118                      | 1.978         | 0.100      | -                 |             |
| Weight loss <sup>  </sup>      | -1.785                      | 2.218         | -0.342     | 0.480             | -           |

  

|                                | Health and Retirement Study |               |            |                   |             |
|--------------------------------|-----------------------------|---------------|------------|-------------------|-------------|
|                                | Gait speed                  | Grip strength | Exhaustion | Physical activity | Weight loss |
| Gait speed <sup>*</sup>        | -                           |               |            |                   |             |
| Grip strength <sup>†</sup>     | 1.579                       | -             |            |                   |             |
| Exhaustion <sup>‡</sup>        | 0.436                       | 2.237         | -          |                   |             |
| Physical activity <sup>§</sup> | -1.407                      | 0.036         | -2.548     | -                 |             |
| Weight loss <sup>  </sup>      | -0.685                      | 1.218         | 1.732      | 1.395             | -           |

\* Gait speed (m/s) was measured over a 4.6-meter and a 2.5-meter course in the Cardiovascular Health Study and the Health and Retirement Study, respectively.

† Grip strength (kg) was measured by a hand dynamometer in both cohorts.

‡ Exhaustion was measured by two items from the Center for Epidemiologic Studies Depression Scale (“I could not get going” and “I felt that everything I did was an effort”); the total score ranged from 0-12 in the Cardiovascular Health Study and from 0-2 in the Health and Retirement Study.

§ Physical activity was measured by self-reported total energy expenditure in the Cardiovascular Health Study and by self-reported frequency of light, moderate, and vigorous activities in the Health and Retirement Study.

|| Weight loss was defined as (weight in previous visit - current weight measure)/(weight in previous visit)×100%.

**Web Table 7.** Goodness of fit indices of confirmatory factor analyses (sensitivity analysis).

| Goodness-of-fit<br>Indices       | Cardiovascular Health Study        |                      |                                      |                      | Health and Retirement Study        |                      |                                      |                      |
|----------------------------------|------------------------------------|----------------------|--------------------------------------|----------------------|------------------------------------|----------------------|--------------------------------------|----------------------|
|                                  | 5 indicators measured<br>N = 4,243 |                      | ≥1 indicator unmeasured<br>N = 4,938 |                      | 5 indicators measured<br>N = 7,600 |                      | ≥1 indicator unmeasured<br>N = 9,221 |                      |
|                                  | Model A*                           | Model B†             | Model A*                             | Model B†             | Model A*                           | Model B†             | Model A*                             | Model B†             |
| $\chi^2_5$<br>( <i>p</i> -value) | 10.56<br>(.061)                    | 11.74<br>(.038)      | 11.32<br>(.045)                      | 12.43<br>(.029)      | 52.65<br>(<.001)                   | 56.96<br>(<.001)     | 56.09<br>(<.001)                     | 60.06<br>(<.001)     |
| CFI                              | .991                               | .989                 | .992                                 | .990                 | .976                               | .973                 | .978                                 | .976                 |
| TLI                              | .982                               | .978                 | .984                                 | .981                 | .951                               | .946                 | .957                                 | .953                 |
| RMSEA<br>(90% CI)                | .016<br>(.000, .030)               | .018<br>(.004, .031) | .016<br>(.002, .029)                 | .017<br>(.005, .030) | .035<br>(.027, .044)               | .037<br>(.029, .046) | .033<br>(.026, .041)                 | .035<br>(.027, .043) |
| Ill localized fit                | None                               | None                 | None                                 | None                 | None                               | None                 | None                                 | None                 |

**Abbreviations:** CFI, Comparative Fit Index; TLI, Tucker-Lewis Index; RMSEA, root mean square error of approximation; CI, confidence interval.

**Notes:** CFI ≥ .95, TLI ≥ .95, and RMSEA ≤ .05 indicate ideal model fit; non-significant  $\chi^2$  statistic indicates ideal model fit.

\* Gait speed adjusted for sex and standing height, grip strength adjusted for sex and body mass index, exhaustion, physical activity, and percentage weight loss were included.

† Gait speed adjusted for sex and standing height, grip strength adjusted for sex and body mass index, exhaustion, physical activity, and weight difference were included.



**Web Table 8.** Relative importance of five indicators in measuring frailty.

| Tests                             | CHS                                    |                | HRS                                    |                |
|-----------------------------------|----------------------------------------|----------------|----------------------------------------|----------------|
|                                   | All 5 indicators measured<br>N = 4,243 |                | All 5 indicators measured<br>N = 7,600 |                |
|                                   | $\Delta\chi^2$                         | <i>p</i> value | $\Delta\chi^2$                         | <i>p</i> value |
| Gait speed* = Grip strength†      | 31.65                                  | <.001          | 42.17                                  | <.001          |
| Gait speed = Exhaustion‡          | 22.92                                  | <.001          | 51.23                                  | <.001          |
| Gait speed = Physical activity§   | 34.01                                  | <.001          | 18.61                                  | <.001          |
| Gait speed = Weight loss          | 189.37                                 | <.001          | 345.33                                 | <.001          |
| Grip strength = Exhaustion        | 0.56                                   | .454           | 3.47                                   | .063           |
| Grip strength = Physical activity | 0.40                                   | .527           | 1.50                                   | .220           |
| Grip strength = Weight loss       | 70.56                                  | <.001          | 207.36                                 | <.001          |
| Exhaustion = Physical activity    | 2.04                                   | .153           | 13.37                                  | <.001          |
| Exhaustion = Weight loss          | 84.52                                  | <.001          | 214.77                                 | <.001          |
| Physical activity = Weight loss   | 57.10                                  | <.001          | 292.60                                 | <.001          |

**Abbreviations:** CHS, Cardiovascular Health Study; HRS, Health and Retirement Study.

\* Gait speed (m/s) was measured over a 4.6-meter and a 2.5-meter course in the Cardiovascular Health Study and the Health and Retirement Study, respectively.

† Grip strength (kg) was measured by a hand dynamometer in both cohorts.

‡ Exhaustion was measured by two items from the Center for Epidemiologic Studies Depression Scale (“I could not get going” and “I felt that everything I did was an effort”); the total score ranged from 0-12 in the Cardiovascular Health Study and from 0-2 in the Health and Retirement Study.

§ Physical activity was measured by self-reported total energy expenditure in the Cardiovascular Health Study and by self-reported frequency of light, moderate, and vigorous activities in the Health and Retirement Study.

|| Weight loss was defined as (weight in previous visit - current weight measure)/(weight in previous visit)×100%.

**Web Figure 2.** Distribution of scores on the continuous frailty scale in the Cardiovascular Health Study (CHS) and the Health and Retirement Study (HRS).

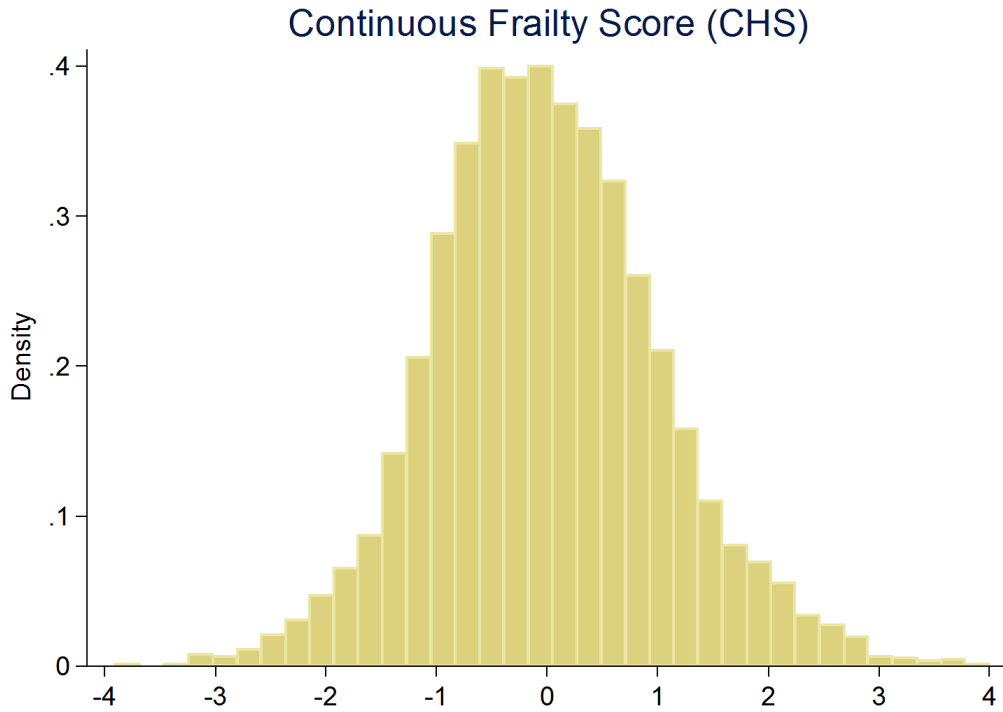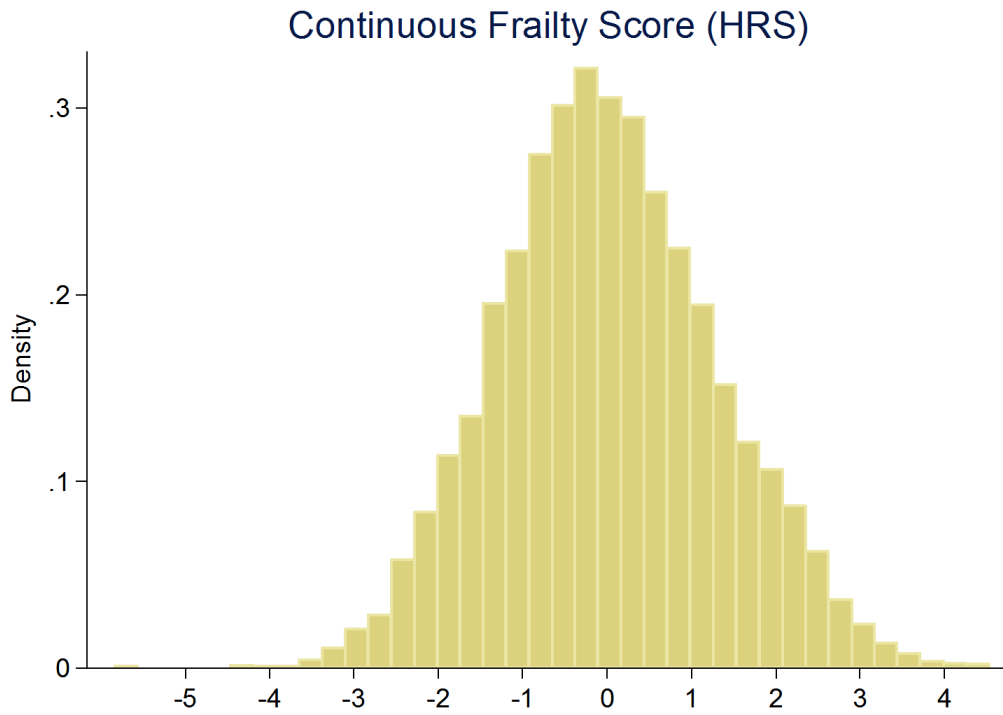

**Web Table 9.** Descriptive statistics of scores on the continuous frailty scale among robust, prefrail, and frail adults identified by the physical frailty phenotype scale.

|                                                | Score on the continuous frailty scale |        |                          |                          | <i>p</i> <sup>*</sup> |
|------------------------------------------------|---------------------------------------|--------|--------------------------|--------------------------|-----------------------|
|                                                | Mean ± SD                             | Median | 1 <sup>st</sup> quartile | 3 <sup>rd</sup> quartile |                       |
| <b>Cardiovascular Health Study (N = 4,243)</b> |                                       |        |                          |                          |                       |
| Robust                                         | -0.69 ± 0.68                          | -0.63  | -1.06                    | -0.22                    | Ref.                  |
| Prefrail                                       | 0.25 ± 0.74                           | 0.32   | -0.21                    | 0.75                     | <.001                 |
| Frail                                          | 1.57 ± 0.67                           | 1.52   | 1.14                     | 1.99                     | <.001                 |
| <b>Health and Retirement Study (N = 7,600)</b> |                                       |        |                          |                          |                       |
| Robust                                         | -0.93 ± 0.85                          | -0.84  | -1.48                    | -0.30                    | Ref.                  |
| Prefrail                                       | 0.45 ± 0.87                           | 0.49   | -0.10                    | 1.02                     | <.001                 |
| Frail                                          | 2.10 ± 0.70                           | 2.08   | 1.62                     | 2.53                     | <.001                 |

**Abbreviations:** SD, standard deviation.

\* *p*-values from post hoc multiple comparisons in analysis of variance after Bonferroni correction.

**Web Figure 3.** Distribution of continuous frailty score among robust, prefrail, and frail persons identified by the physical frailty phenotype scale, Cardiovascular and Health Study.

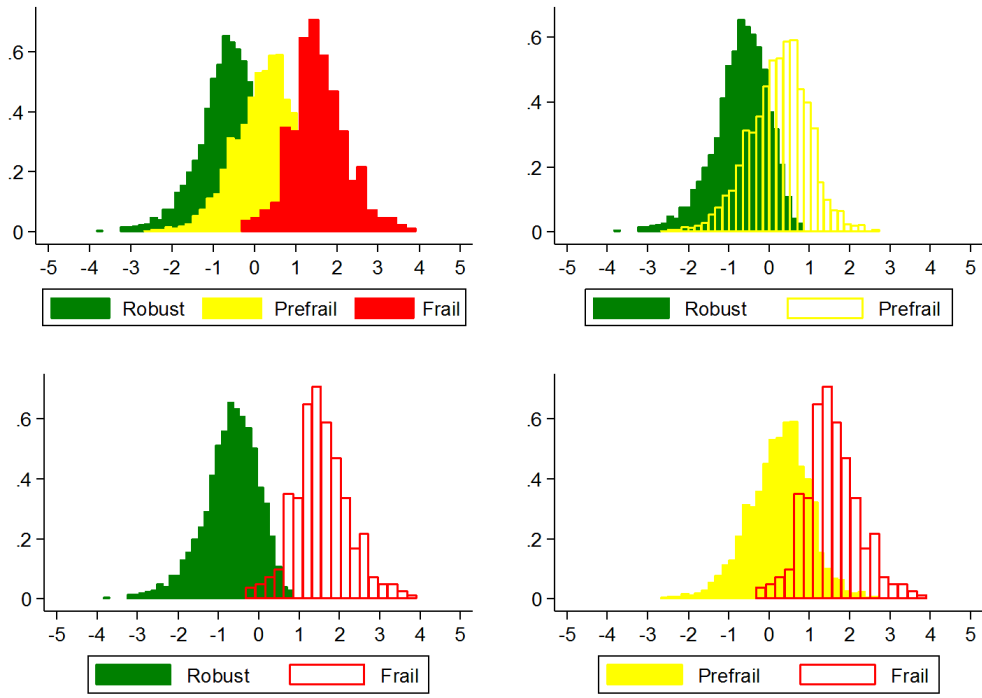

**Web Figure 4.** Distribution of continuous frailty score among robust, prefrail, and frail persons identified by the physical frailty phenotype scale, Health and Retirement Study.

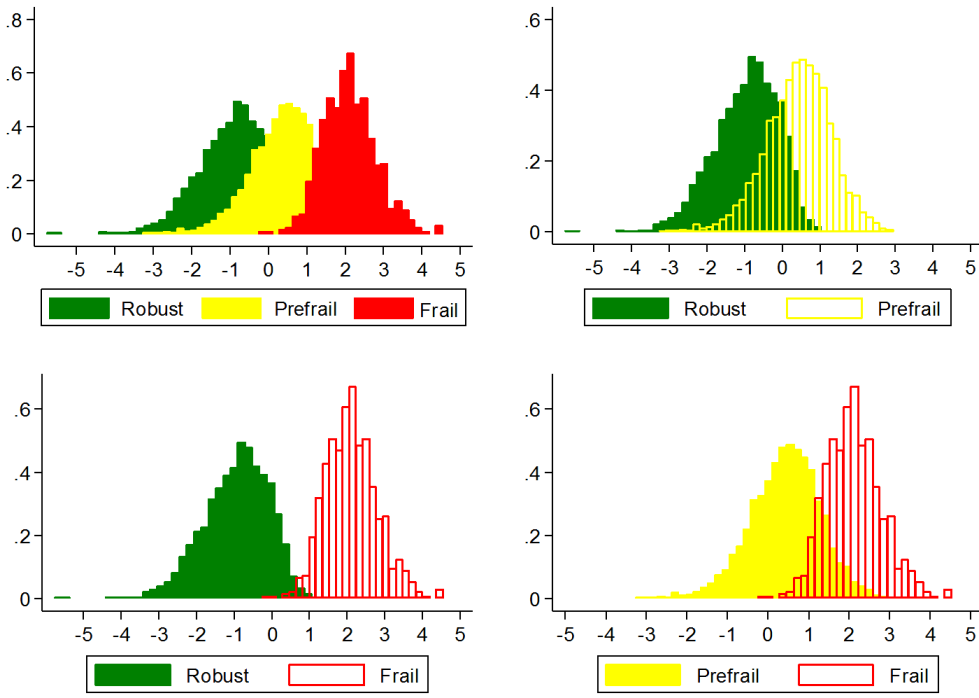

**Web Table 10.** Cross-tabulation of quintiles of scores on the continuous frailty scale and the physical frailty phenotype scale.

| <b>Cardiovascular Health Study</b> |                                         |                 |              |
|------------------------------------|-----------------------------------------|-----------------|--------------|
| <b>(N = 4,243)</b>                 |                                         |                 |              |
|                                    | <b>Physical frailty phenotype scale</b> |                 |              |
| <b>Continuous frailty scale</b>    | <b>Robust</b>                           | <b>Prefrail</b> | <b>Frail</b> |
| 1 <sup>st</sup> quintile           | 698                                     | 145             | 0            |
| 2 <sup>nd</sup> quintile           | 590                                     | 267             | 0            |
| 3 <sup>rd</sup> quintile           | 439                                     | 407             | 7            |
| 4 <sup>th</sup> quintile           | 174                                     | 648             | 19           |
| 5 <sup>th</sup> quintile           | 4                                       | 515             | 330          |
| <b>Total</b>                       | <b>1,905</b>                            | <b>1,982</b>    | <b>356</b>   |

  

| <b>Health and Retirement Study</b> |                                         |                 |              |
|------------------------------------|-----------------------------------------|-----------------|--------------|
| <b>(N = 7,600)</b>                 |                                         |                 |              |
|                                    | <b>Physical frailty phenotype scale</b> |                 |              |
| <b>Continuous frailty scale</b>    | <b>Robust</b>                           | <b>Prefrail</b> | <b>Frail</b> |
| 1 <sup>st</sup> quintile           | 1,358                                   | 166             | 0            |
| 2 <sup>nd</sup> quintile           | 1,088                                   | 418             | 0            |
| 3 <sup>rd</sup> quintile           | 740                                     | 792             | 2            |
| 4 <sup>th</sup> quintile           | 181                                     | 1,305           | 35           |
| 5 <sup>th</sup> quintile           | 0                                       | 770             | 745          |
| <b>Total</b>                       | <b>3,367</b>                            | <b>3,451</b>    | <b>782</b>   |

**Web Table 11.** Association of frailty with mortality and disability with persons not completing the gait speed or grip strength test included (sensitivity analysis).

|                             | Cardiovascular Health Study<br><i>N</i> = 4558 |                             | Health and Retirement Study<br><i>N</i> = 8768 |                              |
|-----------------------------|------------------------------------------------|-----------------------------|------------------------------------------------|------------------------------|
|                             | Adjusted <sup>†</sup>                          | Fully Adjusted <sup>‡</sup> | Adjusted <sup>†</sup>                          | Fully Adjusted <sup>  </sup> |
|                             | Hazard ratio (95% CI)                          |                             | Hazard ratio (95% CI)                          |                              |
| 5-year Mortality            |                                                |                             |                                                |                              |
| Continuous frailty score    | 1.54 (1.43, 1.66)                              | 1.23 (1.13, 1.36)           | 1.60 (1.54, 1.67)                              | 1.39 (1.31, 1.48)            |
| Quintiles                   |                                                |                             |                                                |                              |
| 1 <sup>st</sup> quintile    | Ref.                                           | Ref.                        | Ref.                                           | Ref.                         |
| 2 <sup>nd</sup> quintile    | 1.26 (0.93, 1.70)                              | 1.08 (0.79, 1.49)           | 1.55 (1.20, 1.99)                              | 1.34 (1.00, 1.79)            |
| 3 <sup>rd</sup> quintile    | 1.39 (1.04, 1.86)                              | 1.17 (0.86, 1.60)           | 2.09 (1.64, 2.65)                              | 1.72 (1.31, 2.27)            |
| 4 <sup>th</sup> quintile    | 2.10 (1.60, 2.76)                              | 1.60 (1.19, 2.15)           | 3.52 (2.80, 4.42)                              | 2.59 (1.98, 3.39)            |
| 5 <sup>th</sup> quintile    | 3.67 (2.80, 4.80)                              | 2.03 (1.49, 2.78)           | 5.97 (4.76, 7.50)                              | 3.41 (2.57, 4.52)            |
|                             | <i>N</i> = 3439 (initially non-disabled)       |                             | <i>N</i> = 6623 (initially non-disabled)       |                              |
| 2-year incident Disability* | Adjusted <sup>†</sup>                          | Fully Adjusted <sup>‡</sup> | Adjusted <sup>†</sup>                          | Fully Adjusted <sup>  </sup> |
|                             | Risk ratio (95% CI)                            |                             | Risk ratio (95% CI)                            |                              |
| Continuous frailty score    | 1.71 (1.59, 1.85)                              | 1.48 (1.36, 1.62)           | 1.65 (1.60, 1.70)                              | 1.44 (1.36, 1.53)            |
| Quintiles                   |                                                |                             |                                                |                              |
| 1 <sup>st</sup> quintile    | Ref.                                           | Ref.                        | Ref.                                           | Ref.                         |
| 2 <sup>nd</sup> quintile    | 1.46 (1.09, 1.96)                              | 1.33 (0.98, 1.80)           | 1.71 (1.34, 2.20)                              | 1.61 (1.19, 2.18)            |
| 3 <sup>rd</sup> quintile    | 1.87 (1.41, 2.49)                              | 1.54 (1.15, 2.08)           | 2.75 (2.18, 3.46)                              | 2.24 (1.68, 2.98)            |
| 4 <sup>th</sup> quintile    | 2.83 (2.16, 3.71)                              | 2.25 (1.69, 2.99)           | 4.30 (3.45, 5.36)                              | 2.92 (2.20, 3.87)            |
| 5 <sup>th</sup> quintile    | 4.40 (3.35, 5.78)                              | 2.92 (2.16, 3.96)           | 7.85 (6.32, 9.74)                              | 4.21 (3.14, 5.63)            |

**Abbreviations:** PY, person-year; CI, confidence interval; ADL, activities of daily living.

For participants who were unable to conduct the gait speed or grip strength test, their scores were imputed as two standard deviations below the mean.

\* Participants with difficulty in any ADLs (dressing, eating, toileting, bathing, transferring, and walking across a room) were considered disabled.

† Adjusted for clinic site (only for the Cardiovascular Health Study), age, sex, race/ethnicity, and education.

‡ Adjusted for clinic site, age, sex, race/ethnicity, education, smoking status, body mass index, history of coronary heart disease, heart failure, stroke, hypertension, diabetes, cancer, and arthritis, cognitive function, disability (only for analyses of mortality), systolic and diastolic blood pressure, C-reactive protein, cystatin C, and total cholesterol.

|| Adjusted for age, sex, race/ethnicity, education, smoking status, body mass index, history of cardiac disease, stroke, hypertension, diabetes, cancer, and arthritis, cognitive function, disability (only for analyses of mortality), blood pressure, C-reactive protein, cystatin C, and total cholesterol.

**Web Table 12.** Association of frailty with mortality and disability among persons classified as robust, prefrail, and frail by the frailty phenotype scale with persons not completing the gait speed or grip strength test included (sensitivity analysis).

| 5-year Mortality                            | Cardiovascular Health Study |                             | Health and Retirement Study |                              |
|---------------------------------------------|-----------------------------|-----------------------------|-----------------------------|------------------------------|
|                                             | Adjusted <sup>‡</sup>       | Fully Adjusted <sup>§</sup> | Adjusted <sup>‡</sup>       | Fully Adjusted <sup>  </sup> |
|                                             | Hazard ratio (95% CI)       |                             | Hazard ratio (95% CI)       |                              |
| <b>Robust*</b>                              |                             |                             |                             |                              |
| Continuous frailty score                    | 1.33 (1.05, 1.68)           | 1.12 (0.87, 1.44)           | 1.50 (1.25, 1.81)           | 1.20 (1.01, 1.44)            |
| Quintiles                                   |                             |                             |                             |                              |
| 1 <sup>st</sup> quintile                    | Ref.                        | Ref.                        | Ref.                        | Ref.                         |
| 2 <sup>nd</sup> quintile                    | 1.21 (0.84, 1.75)           | 0.96 (0.64, 1.44)           | 1.47 (1.09, 1.98)           | 1.42 (1.05, 1.93)            |
| 3 <sup>rd</sup> quintile                    | 1.53 (1.04, 2.26)           | 1.11 (0.72, 1.70)           | 1.91 (1.37, 2.64)           | 1.74 (1.24, 2.44)            |
| 4 <sup>th</sup> & 5 <sup>th</sup> quintiles | 1.61 (0.91, 2.84)           | 1.23 (0.67, 2.26)           | 2.82 (1.43, 5.49)           | 2.55 (1.27, 5.13)            |
| <b>Prefrail*</b>                            |                             |                             |                             |                              |
| Continuous frailty score                    | 1.54 (1.33, 1.79)           | 1.26 (1.07, 1.49)           | 1.46 (1.34, 1.60)           | 1.26 (1.13, 1.41)            |
| Quintiles                                   |                             |                             |                             |                              |
| 1 <sup>st</sup> quintile                    | Ref.                        | Ref.                        | Ref.                        | Ref.                         |
| 2 <sup>nd</sup> quintile                    | 1.26 (0.73, 2.18)           | 1.16 (0.63, 2.13)           | 1.34 (0.77, 2.34)           | 1.30 (0.74, 2.27)            |
| 3 <sup>rd</sup> quintile                    | 1.06 (0.63, 1.79)           | 1.03 (0.58, 1.84)           | 1.72 (1.02, 2.91)           | 1.58 (0.93, 2.67)            |
| 4 <sup>th</sup> quintile                    | 1.61 (0.99, 2.61)           | 1.29 (0.74, 2.25)           | 2.74 (1.64, 4.58)           | 2.32 (1.39, 3.89)            |
| 5 <sup>th</sup> quintile                    | 2.72 (1.65, 4.48)           | 1.86 (1.05, 3.31)           | 3.13 (1.84, 5.33)           | 2.54 (1.48, 4.33)            |
| <b>Frail*</b>                               |                             |                             |                             |                              |
| Continuous frailty score                    | 1.17 (0.94, 1.47)           | 1.04 (0.80, 1.34)           | 1.45 (1.29, 1.64)           | 1.26 (1.13, 1.41)            |
| 2-year incident Disability <sup>†</sup>     | Adjusted <sup>‡</sup>       | Fully Adjusted <sup>§</sup> | Adjusted <sup>‡</sup>       | Fully Adjusted <sup>  </sup> |
|                                             | Risk ratio (95% CI)         |                             | Risk ratio (95% CI)         |                              |
| <b>Robust*</b>                              |                             |                             |                             |                              |
| Continuous frailty score                    | 1.81 (1.38, 2.38)           | 1.57 (1.19, 2.07)           | 1.53 (1.28, 1.84)           | 1.35 (1.09, 1.67)            |
| Quintiles                                   |                             |                             |                             |                              |
| 1 <sup>st</sup> quintile                    | Ref.                        | Ref.                        | Ref.                        | Ref.                         |
| 2 <sup>nd</sup> quintile                    | 1.35 (0.93, 1.95)           | 1.20 (0.82, 1.76)           | 1.51 (1.12, 2.03)           | 1.39 (0.98, 1.97)            |
| 3 <sup>rd</sup> quintile                    | 1.51 (1.01, 2.27)           | 1.13 (0.73, 1.75)           | 2.19 (1.59, 3.01)           | 1.78 (1.23, 2.59)            |
| 4 <sup>th</sup> & 5 <sup>th</sup> quintiles | 4.03 (2.67, 6.08)           | 3.03 (1.95, 4.71)           | 3.04 (1.56, 5.95)           | 2.97 (1.31, 6.75)            |
| <b>Prefrail*</b>                            |                             |                             |                             |                              |
| Continuous frailty score                    | 1.54 (1.35, 1.76)           | 1.41 (1.22, 1.63)           | 1.53 (1.42, 1.64)           | 1.40 (1.25, 1.56)            |
| Quintiles                                   |                             |                             |                             |                              |
| 1 <sup>st</sup> quintile                    | Ref.                        | Ref.                        | Ref.                        | Ref.                         |



|                          |                   |                   |                   |                    |
|--------------------------|-------------------|-------------------|-------------------|--------------------|
| 2 <sup>nd</sup> quintile | 1.31 (0.78, 2.19) | 1.27 (0.72, 2.23) | 1.47 (0.86, 2.50) | 2.48 (1.01, 6.09)  |
| 3 <sup>rd</sup> quintile | 1.50 (0.93, 2.41) | 1.38 (0.81, 2.36) | 2.05 (1.24, 3.38) | 3.34 (1.41, 7.93)  |
| 4 <sup>th</sup> quintile | 1.76 (1.11, 2.80) | 1.58 (0.94, 2.65) | 2.92 (1.78, 4.78) | 3.97 (1.67, 9.42)  |
| 5 <sup>th</sup> quintile | 2.63 (1.64, 4.21) | 2.14 (1.25, 3.67) | 4.15 (2.51, 6.84) | 5.02 (2.08, 12.12) |

**Frail\***

|                          |                   |                   |                   |                   |
|--------------------------|-------------------|-------------------|-------------------|-------------------|
| Continuous frailty score | 1.33 (1.05, 1.67) | 1.13 (0.81, 1.57) | 1.38 (1.28, 1.48) | 1.36 (1.16, 1.60) |
|--------------------------|-------------------|-------------------|-------------------|-------------------|

**Abbreviations:** CI, confidence interval; ADL, activities of daily living.

For participants who were unable to conduct the gait speed or grip strength test, their scores on the continuous frailty scale were imputed as two standard deviations below the mean; their scores on the frailty phenotype scale were imputed as 1 (meeting the frailty criterion).

\* Participants were identified as robust, prefrail, and frail based on the frailty phenotype scale (separately for two cohorts). In both cohorts, >90% of frail persons identified by the physical frailty phenotype scale were in the 5<sup>th</sup> quintile of the continuous frailty scale.

† Participants who reported having difficulty in any of six ADLs (dressing, eating, toileting, bathing, transferring or getting out of bed, and walking across a room) were considered disabled. Only initially non-disabled participants were included.

‡ Adjusted for clinic site (only for the Cardiovascular Health Study), age, sex, race/ethnicity, and education.

§ Adjusted for clinic site, age, sex, race (white, black), education (less than high school, high school or equivalent, and more than high school), smoking status (current, former, and never), body mass index (<25.0, 25.0-30.0, and >30.0), history of coronary heart disease, heart failure, stroke, hypertension, diabetes, cancer, and arthritis, cognitive function measured by the modified mini-mental status examination, ADL difficulty (none vs. any; only for analyses of mortality), systolic and diastolic blood pressure, C-reactive protein, cystatin C, and total cholesterol.

|| Adjusted for age, sex, race (white, black, others), education (less than high school, high school or equivalent, and more than high school), smoking status (current, former, and never), body mass index (<25.0, 25.0-30.0, and >30.0), history of cardiac disease (heart attack, coronary heart disease, angina, heart failure, or other heart problems), stroke, hypertension, diabetes, cancer, and arthritis, cognitive function measured by the Telephone Interview for Cognitive Status, ADL difficulty (none vs. any; only for analyses of mortality), systolic and diastolic blood pressure, C-reactive protein, cystatin C, and total cholesterol.
